# Supplementary material for: Upgrading of efficient and scalable CRISPR–Cas-mediated technology for genetic engineering in thermophilic fungus Myceliophthora thermophila
Source: PubMed Central journal article supplement (PMC6927189; doi:10.1186/s13068-019-1637-y), 2019-12-23
Supplement: 13068_2019_1637_MOESM2_ESM.pdf [file 13068_2019_1637_MOESM2_ESM.pdf]

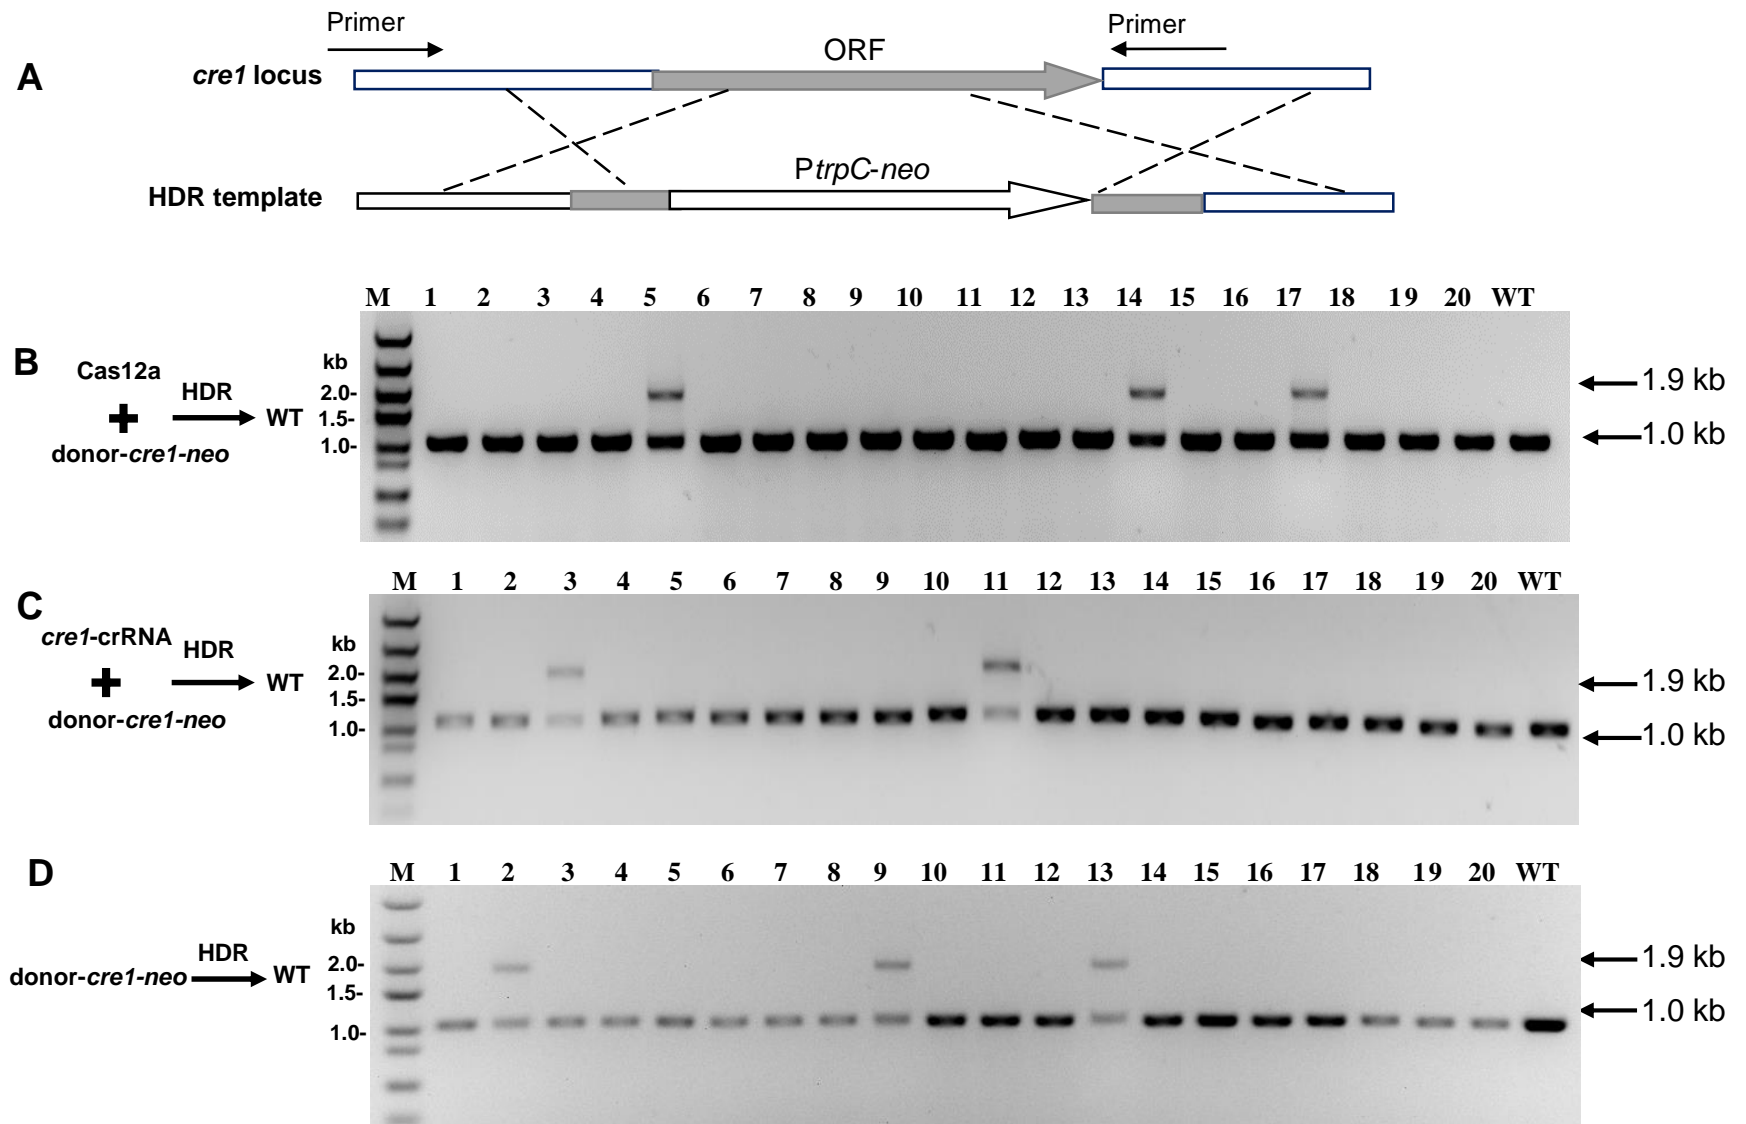

**Figure S1** Verification of *cre-I* gene deletions in selected transformants with co-transformation of only Cas12a and donor DNA, only crRNA and donor DNA, or only donor DNA. (A) Schematic of homologous recombination (HR) of target gene *cre-I*. (B–D) PCR analysis of *cre-I* deletion (B–D) with one primer (*cre1-out-F*) located upstream of the 5' flanking region of genomic DNA and the other (*cre1-in-R*) located in the 3' flanking region of genomic DNA. The expected length of disrupted transformants was 1.9 kb, while that of the WT host strain, used as a negative control, was 1.0 kb (rightmost lane). Heterokaryotic transformants showed two PCR bands (both of wild-type and knockout). HDR, homology-directed repair; WT, wild type.
