# Supplementary material for: Upgrading of efficient and scalable CRISPR–Cas-mediated technology for genetic engineering in thermophilic fungus Myceliophthora thermophila
Source: PubMed Central journal article supplement (PMC6927189; doi:10.1186/s13068-019-1637-y), 2019-12-23
Supplement: 13068_2019_1637_MOESM10_ESM.pdf [file 13068_2019_1637_MOESM10_ESM.pdf]

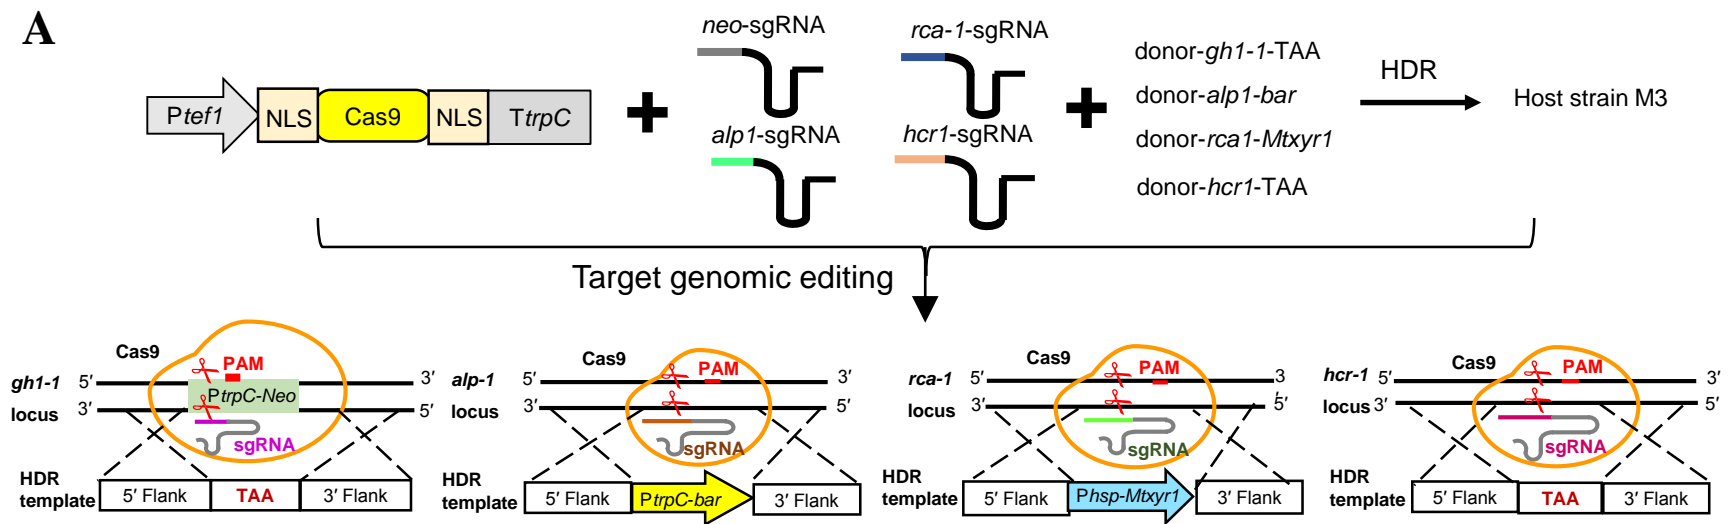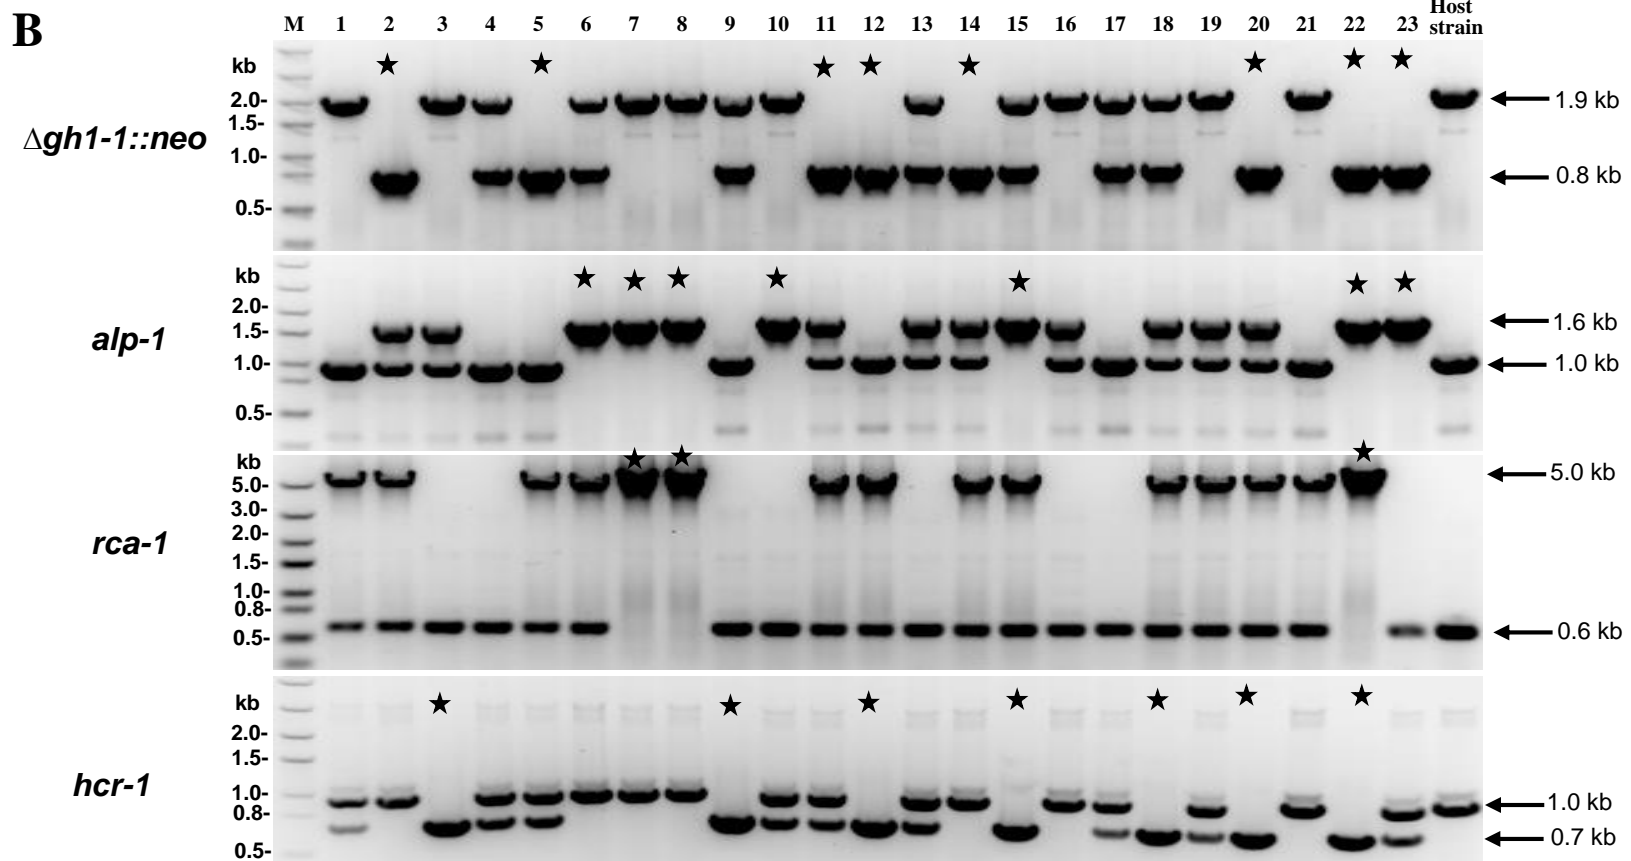

**Figure S9.** Second round of target genomic editing by CRISPR-Cas9 system. (A) Schematic of homologous recombination (HR) of *neo*, *alp-1*, *rca-1* and *hcr-1* mediated by Cas12a, array2 and donor DNA. (B) PCR analysis of quadruple-gene deletion of *neo*, *alp-1*, *rca-1* and *hcr-1* in selected transformants using one primer (*gh1-1-out-F2*, *alp1/rca1/hcr1-out-F*) located upstream of the 5' flanking region of genomic DNA and the other primer (*gh1-1-in-R2*, *alp1/rca1/hcr1-in-R*) located in the 3' flanking region of genomic DNA. The expected lengths of disrupted transformants of *neo*, *alp1*, *rca-1* and *hcr-1* were 0.8, 1.6, 5.0 and 0.7 kb, respectively, while those of the host strain (rightmost lane) was 1.9, 1.0, 0.6 and 1.0 kb, respectively. Heterokaryotic transformants showed two PCR bands (both of wild-type and knockout). Symbol star indicated deletion mutant. HDR, homology-directed repair.
