# Supplementary material for: Upgrading of efficient and scalable CRISPR–Cas-mediated technology for genetic engineering in thermophilic fungus Myceliophthora thermophila
Source: PubMed Central journal article supplement (PMC6927189; doi:10.1186/s13068-019-1637-y), 2019-12-23
Supplement: 13068_2019_1637_MOESM12_ESM.pdf [file 13068_2019_1637_MOESM12_ESM.pdf]

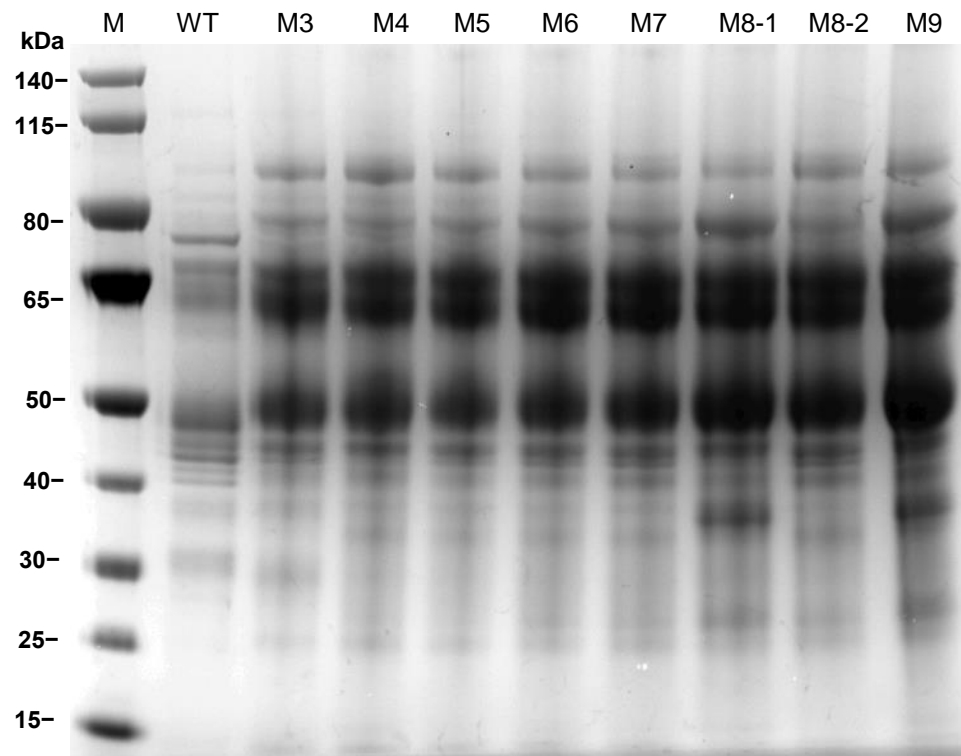

**Figure S11.** SDS-PAGE of secreted protein from the eight mutant strains and wild type strain (WT) cultured for 6 days in Avicel inducing medium supplemented with 0.75% yeast extract.
